# Supplementary material for: Telogator: a method for reporting chromosome-specific telomere lengths from long reads
Source: Oxford University Press journal article supplement (doi:10.1093/bioinformatics/btac005), 2022-01-10
Supplement: btac005_supplementary_data.pdf [file btac005_supplementary_data.pdf]

# Telogator: a method for reporting chromosome-specific TL in humans from long read sequencing data – Supplementary Data

December 10, 2021

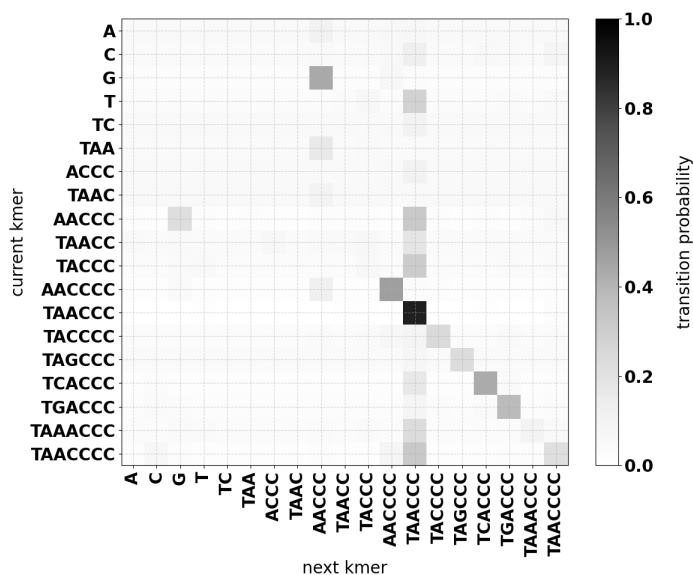

Figure 1: Telomere kmer transition matrix computed from T2T telomere sequences.

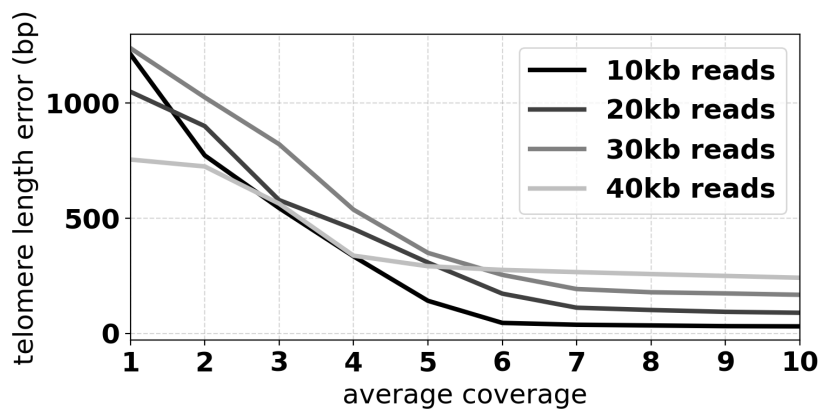

Figure 2: Median TL error vs. coverage.

| <b>kmer sequence</b> | <b>type</b>      |
|----------------------|------------------|
| CCCCAA               | j-type           |
| CCCTAA               | t-type           |
| CCCTCA               | g-type           |
| CCCTGA               | c-type           |
| CCCAA                | other variations |
| CCCCTA               |                  |
| CCCCTAA              |                  |
| CCCGA                |                  |
| CCCTA                |                  |
| CCCTAAA              |                  |
| CCCTAG               |                  |
| CCTA                 |                  |
| CCTAA                |                  |

Table 1: Frequent kmers extracted from T2T telomere sequences (forward strand).

| <b>SRA Run ID (short reads)</b> | <b>SRA Run ID (long reads)</b> | <b>Sample ID</b> |
|---------------------------------|--------------------------------|------------------|
| SRR14724532                     | SRR11008518                    | HG002            |
| ERR3241754                      | ERR3861414                     | HG00731          |
| ERR3241755                      | ERR3861405                     | HG00732          |
| ERR3988973                      | ERR3861412                     | HG02011          |
| ERR3989019                      | ERR3861400                     | HG02492          |
| ERR3989118                      | ERR3861397                     | HG03065          |
| ERR3989162                      | ERR3861407                     | HG03371          |
| ERR3989199                      | ERR3861403                     | HG03683          |
| ERR3989317                      | ERR3861409                     | NA12329          |
| ERR3989454                      | ERR3861402                     | NA19983          |

Table 2: SRA run IDs for short and long reads for 10 samples processed by Telogator.

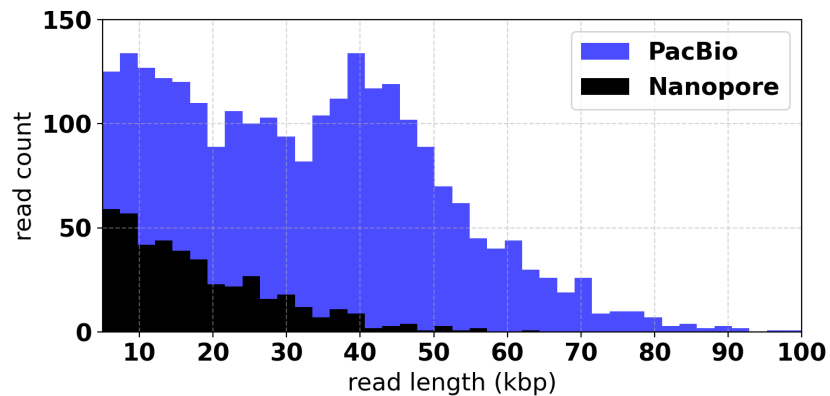

Figure 3: Read count and length for reads spanning telomere/subtelomere boundaries in HG002 PacBio vs. Nanopore.

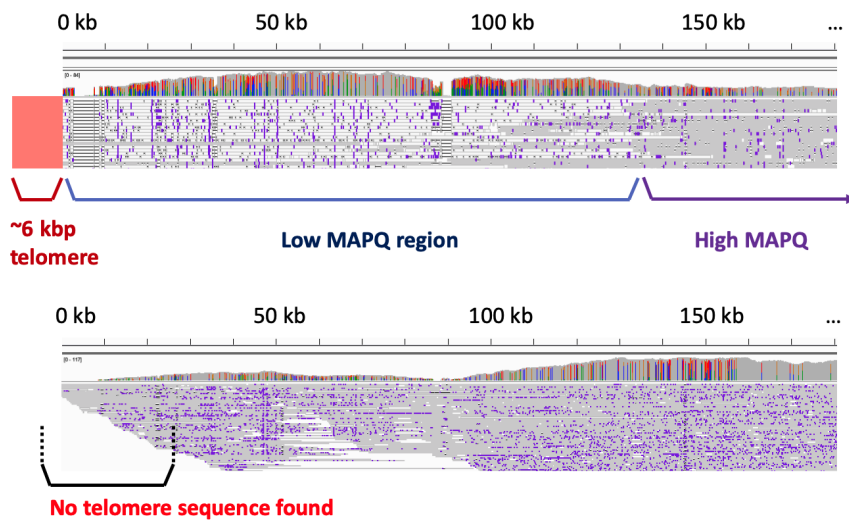

Figure 4: Annotated screenshot showing very long Nanopore reads (top) and PacBio CLR reads (bottom) aligned to alternate subtelomere 8p assembly. The large region of low mapping quality is due to sequence similarity with subtelomere 19p.
